# Supplementary material
Source: PubMed Central journal article supplement (PMC6006506)
Supplement: NIHMS973745-supplement-supporting.pdf [file NIHMS973745-supplement-supporting.pdf]

## Supporting Information

### Monoclonal antibody that recognizes diethoxyphospho-tyrosine modified proteins and peptides independent of surrounding amino acids

Seda Onder<sup>1,2</sup>, Alicia J. Dafferner<sup>2</sup>, Lawrence M. Schopfer<sup>2</sup>, Gaoping Xiao<sup>3</sup>, Udaya Yerramalla<sup>4</sup>, Ozden Tacal<sup>1</sup>, Thomas A. Blake<sup>5</sup>, Rudolph C. Johnson<sup>5</sup>, Oksana Lockridge<sup>2</sup>

<sup>1</sup>Department of Biochemistry, School of Pharmacy, Hacettepe University, Ankara, 06100, Turkey

<sup>2</sup>Eppley Institute, University of Nebraska Medical Center, Omaha, NE, 68198, USA

<sup>3</sup>Syd Labs, Inc., Natick, MA, 01760, USA

<sup>4</sup>Precision Antibody, Columbia, MD 21045, USA

<sup>5</sup>Division of Laboratory Sciences, National Center for Environmental Health, Centers for Disease Control & Prevention, 4770 Buford Highway NE, Chamblee, GA, 30341, USA

[sedaonder@hacettepe.edu.tr](mailto:sedaonder@hacettepe.edu.tr), [adafferner@unmc.edu](mailto:adafferner@unmc.edu), [lmschopf@unmc.edu](mailto:lmschopf@unmc.edu)  
[gpxiao@sydlabs.com](mailto:gpxiao@sydlabs.com), [uyerramalla@precisionantibody.com](mailto:uyerramalla@precisionantibody.com), [tacal@hacettepe.edu.tr](mailto:tacal@hacettepe.edu.tr)  
[rmj6@cdc.gov](mailto:rmj6@cdc.gov), [fsi3@cdc.gov](mailto:fsi3@cdc.gov), [olockrid@unmc.edu](mailto:olockrid@unmc.edu)

\*Corresponding author:

Oksana Lockridge

Eppley Institute

University of Nebraska Medical Center

Omaha, NE 68198-5900 USA

1 402 559 6032; [olockrid@unmc.edu](mailto:olockrid@unmc.edu)

## Reagents for characterizing monoclonal antibody depY

Table S1 lists the diethoxyphosphorylated proteins prepared for this project. Appendix S1 identifies each modified residue and the ratio of labeled to unlabeled amino acids.

Table S1. Proteins diethoxyphosphorylated by chlorpyrifos oxon (CPO).

| Protein name                                    | Accession number |
|-------------------------------------------------|------------------|
| Human albumin                                   | P02768           |
| Mouse albumin                                   | P07724           |
| Aprotinin; pancreatic trypsin inhibitor, bovine | P00974           |
| Casein bovine isozyme mixture                   |                  |
| Alpha S1                                        | P02662           |
| Alpha S2                                        | P02663           |
| Beta                                            | P02666           |
| CSN2                                            | P02666           |
| kappa                                           | P02668           |
| Lysozyme gallus gallus                          | P00698           |
| Bovine tubulin                                  |                  |
| Alpha1B                                         | P81947           |
| Beta-7                                          | E1B953           |
| Beta-4B                                         | Q3MHM5           |
| Porcine tubulin                                 |                  |
| Alpha-1A                                        | P02550           |
| Alpha-1B                                        | Q2XVP4           |
| Beta                                            | Q767L7           |
| Beta                                            | P02554           |

Casein is the most informative OP-modified protein for our purposes because tyrosines were exclusively modified by reaction with CPO. In contrast, human albumin, mouse albumin, bovine tubulin, and porcine tubulin were modified on tyrosines and lysines.

Table S2 lists diethoxyphosphate-tyrosine labeled peptides conjugated to carrier proteins. Mass spectrometry identified OP-labeled tyrosine as the modified residue in each peptide before it was crosslinked to the carrier protein. The number of OP-peptides per protein molecule was determined by MALDI-TOF mass spectrometry as illustrated in Figure S1.

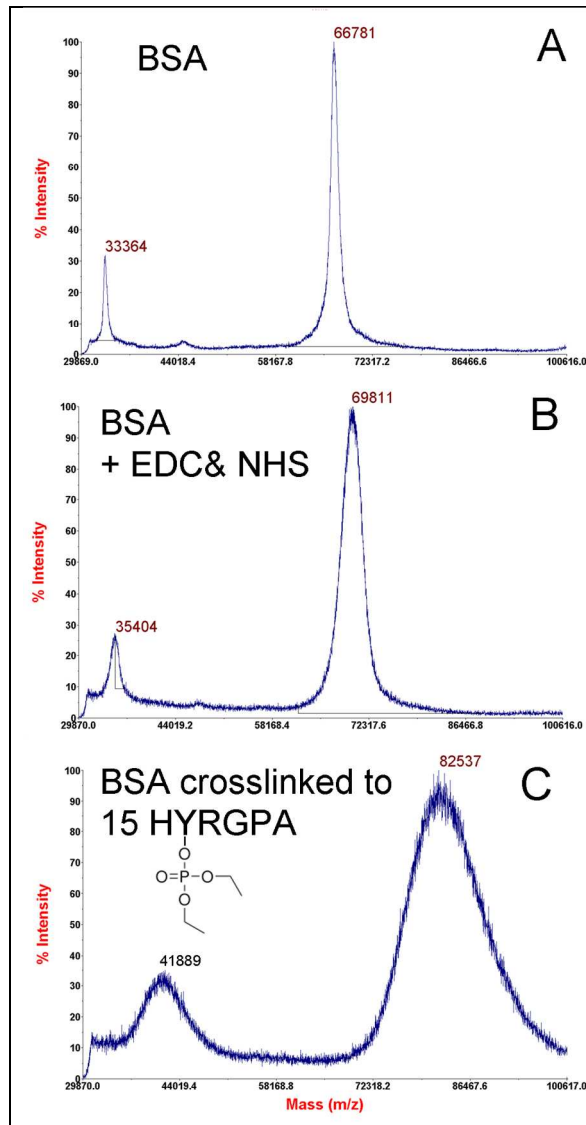

Figure S1. Quantitation of number of OP-peptides bound per molecule of bovine albumin (BSA). Maldi-TOF spectra were acquired in linear mode for samples in sinapinic acid.

A) peaks for doubly and singly charged BSA.

B) BSA in the presence of the crosslinking agents EDC and sulfoNHS.

C) BSA crosslinked to HYRGPA-OP modified on tyrosine by diethoxy phosphate. The difference in mass between 82537 (panel C) and 69811 (panel B) is 12726, which divided by 835 for the mass of the OP-peptide, calculates to 15 peptides bound per molecule of BSA.

Table S2. Diethoxyphospho-tyrosine peptides conjugated to carrier proteins.

For immunization; mixture of bovine albumin (BSA) conjugated to 5 different OP-peptides, in 0.1 M MES pH 6.2

|                                  |                     |
|----------------------------------|---------------------|
| BSA + LYGLPR-OP; 16 peptides/BSA | 1 mg in 400 $\mu$ L |
| BSA + KYA-CPO; 19 peptides/BSA)  | 1 mg in 400 $\mu$ L |
| BSA + PVYSR-OP; 16 peptides/BSA  | 1 mg in 400 $\mu$ L |
| BSA + HYRGPA-OP; 15 peptides/BSA | 1 mg in 400 $\mu$ L |
| BSA + EPNVSY-OP; 10 peptides/BSA | 1 mg in 400 $\mu$ L |

For boosting; mixture of ovalbumin (OVA) and human albumin (HSA) conjugated to 5 different OP-peptides

|                                        |                     |
|----------------------------------------|---------------------|
| OVA + RSLYAS-OP; 18 & 22 peptides/OVA  | 1 mg in 400 $\mu$ L |
| OVA + YGGFL-OP; 9, 5 & 12 peptides/OVA | 1 mg in 400 $\mu$ L |
| OVA + YPF-OP; 10, 6 & 14 peptides/OVA  | 1 mg in 400 $\mu$ L |
| HSA + PPYRM-OP; 22 peptides/HSA        | 1 mg in 400 $\mu$ L |
| HSA + QYDVRK-OP; 7 peptides/HSA        | 1 mg in 400 $\mu$ L |

For screening hybridoma culture media; mixture of lysozyme conjugated to 3 different OP peptides

|                                                   |                     |
|---------------------------------------------------|---------------------|
| Lysozyme + RARYEM-OP; 6 & 9 peptides/lysozyme     | 1 mg in 400 $\mu$ L |
| Lysozyme + GGYR-OP; 4, 10 & 16 peptides/lysozyme  | 2 mg in 800 $\mu$ L |
| Lysozyme + KYK-OP; 1, 5, 9 & 12 peptides/lysozyme | 2 mg in 800 $\mu$ L |

For re-screening hybridoma culture media

|                  |               |
|------------------|---------------|
| Human albumin-OP | in Appendix 1 |
| Mouse albumin-OP | in Appendix 1 |

For ELISA and Western blots  
 HSA + YGGFL-OP; 5 peptides/HSA  
 HSA + QYDVRK-OP; 7 peptides/HSA  
 Lysozyme-PYYMRR-OP  
 BSA-LYGLPR-OP; 16 peptides/BSA  
 OVA-RSLYAS-OP; 18 & 22 peptides/OVA

Table S3. Diethoxyphosphate-tyrosine peptides (no protein)

|                |                 |
|----------------|-----------------|
| RARYEM-CPO     | HYRGPA-CPO      |
| GGYR-CPO       | PPYRM-CPO       |
| GGYR-paraoxon  | QYDVRK-CPO      |
| KYK-CPO        | VSYSK-CPO       |
| RSLYAS-CPO     | LYGLPR-paraoxon |
| GTYKW-paraoxon | SGYTR-CPO       |
| PYYMRR-CPO     | YGGFL-CPO       |

Table S4. Additional reagents for characterizing the specificity of depY

Human albumin-lysine-OP 14/albumin  
 Human albumin-phospho-tyrosine 4/albumin  
 Human BChE modified on serine 198 with CPO  
 Human BChE modified on serine 198 with phosphate  
 Human BChE modified on serine 198 with cresylphosphate  
 Human BChE modified on serine 198 with dichlorvos

## Appendix S1. Identification and quantitation of residues modified by reaction of proteins with chlorpyrifos oxon.

**Procedure.** 1 mg/ml protein (human albumin, bovine tubulin, porcine tubulin, casein, lysozyme, aprotinin) in 20 mM TrisCl pH 8.9, 0.01% sodium azide was incubated at 37°C with chlorpyrifos oxon (Chem Service, MET 674B) dissolved in ethanol to make 1.5 mM CPO. At the end of the 7-day reaction period, disulfide bonds were reduced and alkylated. Samples were dialyzed against 10 mM ammonium bicarbonate, 0.01% azide at 4°C, before they were digested with pepsin or trypsin. Peptic peptides were analyzed on the 4800 MALDI-TOF/TOF mass spectrometer, where % labeled was calculated from relative peak heights. Tryptic peptides were analyzed by LC-MS/MS on the 6600 Triple TOF mass spectrometer where % labeled was calculated from spectral counts.

### Human albumin P02768

1 mkwvtfisll flfssaysrg vfrrdahkse vahrfkdlge enfkalvlia faqylqqcpcf  
 61 edhvklnvnev tefaktcvad esaencdksl htlfgdklct vatlretyge madccakqep  
 121 ernecflqh<sup>k</sup> ddnpnlprlv rpevdvmcta fhdneetflk k<sup>v</sup>lyeiarrh pyf<sup>v</sup>apellf  
 181 fakry<sup>k</sup>aaft eccqaadkaa cllpkldelr deg<sup>k</sup>assakq rl<sup>k</sup>caslqkf geraf<sup>k</sup>awav  
 241 arlsqrfpka efaevsklvt dltkvhtecc hgdlllecadd radlakyice nqdsissklk  
 301 eccekpillek shciaevend empadlpsla adfveskdvc knyaeakdvf lgmflyeyar  
 361 rhpdyssvll lrlaktyett lekccaaadp hecyakvfde fkplveepqn likqncelfe  
 421 qlge<sup>v</sup>kfqna llvr<sup>v</sup>tk<sup>k</sup>vp qvstptlvev srnlq<sup>k</sup>vgsk cckhpeakrm pcaedylsv  
 481 lnqlcvlhek tpsvdrvtkc cteslvnrrp cfsalevdet yvpkefnaet ftfhadictl  
 541 sekerqikkq talvelvkhk pkat<sup>k</sup>eqlka vmddfaafve kckkaddket cfaeegkklv  
 601 aasqaalg1

| Residue #  | % labeled with diethoxyPhosphate (+136) |            | % labeled with diethoxyPhosphate (+136) |
|------------|-----------------------------------------|------------|-----------------------------------------|
| Y162 (138) | 21%                                     | K130 (106) | 14%                                     |
| Y174 (150) | 2%                                      | K186 (162) | 16%                                     |
| Y425 (401) | 5%                                      | K214 (190) | 67%                                     |
| Y435 (411) | 98%                                     | K223 (199) | 85%                                     |
|            |                                         | K236 (212) | 40%                                     |
|            |                                         | K438 (414) | 4%                                      |
|            |                                         | K455 (431) | 100%                                    |

|  |  |            |     |
|--|--|------------|-----|
|  |  | K565 (541) | 33% |
|--|--|------------|-----|

Numbers in parentheses are residue numbers minus the 24 amino acid signal peptide. Chlorpyrifos made a covalent bond with 4 tyrosines and 8 lysines. This preparation of human albumin-OP was used in ELISA to identify 4 positives in the screen of 30 hybridoma culture media received from SydLabs. It is negative on Western blots hybridized with depY but positive in ELISA.

#### Mouse albumin P07724

1 mkwvtflllll fvsqgsafsrq vfrreahkse iahryndlge qhfkglvlia fsqylqkcsy  
61 dehaklvqev tdfaktcvad esaancdksl htlfqgdklca ipnlrenyge ladcctkqep  
121 ernecflqhk ddnpplppfe rpeaeamcts fkenpttfmg hylhevarrh pyfyapelly  
181 yaeqyneilt qccaeadkes cltpkldgvk ekalvssvrq rmkcssmqkf gerafkawaw  
241 arlsqtfpna dfaeitklat dltkvnkecc hgdllecadd raelakymce nqatissklq  
301 tccdkpllkk ahclsevehd tmpadlpaia adfvedqevc knyaeakdvf lgtflyeysr  
361 rhpdyvs1l lrlakkyeat lekccaeapn pacygtvlae fqplveepkn lvktncdlye  
421 klgeygfqna ilvrvtqkap qvstptlvea arnlgrvgtk cctlpedqrl pcedyylsai  
481 lnrvc1lhek tpvsehvtkc csgslverrp cfsaltvdet yvpkefkaet ftfhsdictl  
541 pekekqikkq talaelvkhk pkataeqlkt vmddfaqfld tcckaadkdt cfstegpnlv  
601 trckdala

| Residue #  | % labeled with diethoxyPhosphate (+136) | Residue #  | % labeled with diethoxyPhosphate (+136) |
|------------|-----------------------------------------|------------|-----------------------------------------|
| Y435 (411) | 83                                      | K210 (186) | 85                                      |
|            |                                         | K212 (188) | 14                                      |
|            |                                         | K223 (199) | 100                                     |
|            |                                         | K236 (212) | 40                                      |
|            |                                         | K376 (352) | 11                                      |
|            |                                         | K460 (436) | 43                                      |

Numbers in parentheses are residue numbers minus the 24 amino acid signal peptide. Chlorpyrifos made a covalent bond with 1 tyrosine and 6 lysines. This mouse albumin-OP preparation was used for screening 30 hybridoma culture media.

#### Aprotinin, Pancreatic Trypsin Inhibitor. Bos Taurus (bovine) P00974

1 msrlslktsg deenwvsrfr skslslvfsg vlalglslsg vgfadarpdf cleppvtgpc  
61 kariiryfyn akaglcqtfv yggcrakrnn fksaedcmrt cgga

| Residue # | % labeled with diethoxyPhosphate(+136) | Residue # | % labeled with diethoxyPhosphate(+136) |
|-----------|----------------------------------------|-----------|----------------------------------------|
| Y56       | 10                                     | K92       | 65                                     |

This preparation gave a weak positive signal on Western blot hybridized with depY.

#### Casein from bovine milk Sigma C5890 is a mixture of isoforms

Alpha S1 46% 8-10 phosphates per mole  
Alpha S2 12% 10-13 phosphates per mole  
Beta 35% 4-5 phosphates per mole  
Kappa 8% 1 phosphate per mole

#### Casein alpha S1 Bos Taurus P02662

1 MKLLILTCLV AVALARPKHP IKHQGLPQEV LLENLLRFFV APFPEVFGKE KVNELSKDIG  
61 SESTEDQAME DIKQMEAESI SSSEQKHIQK EDVPSERYLG YLEQLLRLKK YKVPQLEIVP  
121 NQAEERLHSM KEGIHAQQKE PMIGVNQELA YFYPELFRQF YQLDAYPSGA WYYVPLGTQY  
181 TDAPSFSDIP NPIGSENSEK TTMLPW

| Residue # | % labeled diethoxyPhosphate (+136) | Residue # | % labeled phosphate (+80) |
|-----------|------------------------------------|-----------|---------------------------|
| Y111      | 40                                 | S122      | 91                        |
| Y151      | 9                                  |           |                           |
| Y153      | 9                                  |           |                           |

Phosphosite shows 9 phosphorylated serine residues in casein alpha S1, of which only one was detected by the 6600 Triple TOF mass spectrometer.

### Casein alpha S2 Bos Taurus P02663

1 MKFFIFTCLL AVALAKNTME HVSSSEESII SQETYKQEK N MAINPSKENL CSTFCKEVVR  
 61 NANEEEEYSIG SSSEESA EVA TEEVKITVDD KH<sup>Y</sup>QKALNEI NQF<sup>Y</sup>QKFPQY LQYLYQGPIV  
 121 LNPWDQVQRN AVPIPTLNR EQLSTSEENS KKTVDMESTE VFTKTKL TE EEKNRLNFLK  
 181 KISQR<sup>Y</sup>QKFA LPQYLKTVYQ HQKAMKPW IQ PKTKVIPYVR YL

| Residue | % labeled +136) |
|---------|-----------------|
| Y93     | 5               |
| Y104    | 17              |
| Y186    | 95              |

Phosphosite shows 18 phosphorylated serine and threonine in casein alpha S2.

### Casein beta (CSN2 protein) Bos Taurus P02666

1 MKVLILACL V ALALARELEE LNVPG EIVES LSSSEESITR INKKIEKFQ<sup>S</sup> EEQQQTEDEL  
 61 QDKIH PFAQT QSLVY PFGP IPNSLPQNIP PLTQTPVVVP PFLQPEVLGV SKVKEAMAPK  
 121 HKEMPF PKYP VEPFTE SQSL TLTDVENLHL PLLLLQSWMH QPHQPLPPTV MFPPQSVL SL  
 181 SQSKVLPV PQ KAVP<sup>Y</sup>PQRDM PIQAFLLYQ Q PVLGPVRGPF PIIV

| Residue # | % labeled diethoxyPhosphate (+136) | Residue # | % labeled phosphate (+80) |
|-----------|------------------------------------|-----------|---------------------------|
| Y195      | 10                                 | S50       | 87                        |

Phosphosite shows 7 phosphorylated serine and threonine residues in casein beta.

### Casein CSN2 Bos Taurus P02666

1 MKVLILACL V ALALARELEE LNVPG EIVES LSSSEESITR INKKIEKFQ<sup>S</sup> EEQQQTEDEL  
 61 QDKIH PFAQT QSLVY PFGP IHNSLPQNIP PLTQTPVVVP PFLQPEVMGV SKVKEAMAPK  
 121 HKEMPF PK<sup>Y</sup> VEPFTE SQSL TLTDVENLHL PLPLLQSWMH QPHQPLPPTV MFPPQSVL SL  
 181 SQSKVLPV PQ KAVP<sup>Y</sup>PQRDM PIQAFLLYQ Q PVLGPVRGPF PIIV

| Residue # | % labeled diethoxyPhosphate (+136) | Residue # | % labeled phosphate (+80) |
|-----------|------------------------------------|-----------|---------------------------|
| Y129      | 26                                 | S50       | 89                        |
| Y195      | 10                                 |           |                           |

### Casein kappa Bos Taurus P02668

1 MMKSFFLVVT ILALTL PFLG AQEQNQEQPI RCEKDERFFS DKIAKYIPIQ <sup>Y</sup>VLSRYP SYG  
 61 LNY YQK PVA LINNQFLPYP YYAKPA AVRS PAQILQWQVL SNTVPAKSCQ AQPTT MARHP  
 121 HPHLSFMAIP PKNQDKTEI PTINTIASGE PTSTPTTEAV ESTVATLEDS PEVIESPPEI  
 181 NTVQVTSTAV

| Residue | % labeled (+136) |
|---------|------------------|
| Y51     | 50               |

Phosphosite shows 4 phosphorylated serine and threonine in casein kappa.

This casein-OP preparation gave a strong positive signal in Western blots and ELISA hybridized with depY.

### Lysozyme Gallus gallus P00698

**Red** residues are labeled with diethoxyphosphate.

**Blue** residues are labeled with phosphate.

**Green** residues are labeled with both diethoxyphosphate and phosphate.

1 KVFGRC ELAA AM<sup>K</sup>RHGLDN<sup>Y</sup> RGY<sup>S</sup>LGDWVC AA<sup>K</sup>FESNFNT QATNRNTDG<sup>S</sup> T<sup>D</sup><sup>Y</sup>GILQINS  
 61 RWWCNDGRTP GSRNLCNIPC <sup>S</sup>ALL<sup>SS</sup>DITA <sup>S</sup>VNCA<sup>KK</sup>IVS DGNGMNAWVA WRNRC<sup>K</sup>GTDV  
 121 QAWIRGCR L

| Residue # | % labeled diethoxyPhosphate (+136) | % labeled phosphate (+80) |
|-----------|------------------------------------|---------------------------|
| Y20       | low                                |                           |
| Y23       | 3                                  | 1                         |
| Y53       | 5                                  |                           |
| S24       | low                                | Low                       |
| K13       | 4                                  |                           |
| K33       | 7                                  |                           |
| S50       | Low                                | 1                         |
| T51       | Low                                | 2                         |

|      |     |     |
|------|-----|-----|
| S81  | Low | 1   |
| S85  | Low | Low |
| S86  | Low | low |
| S91  |     | low |
| K96  | 9   | Low |
| K97  | 1   | low |
| K116 | 3   | 3   |

Low means less than 1% labeled. Phospho.elm.eu.org shows two serines (S24 and S50) phosphorylated in lysozyme C (egg white) P00698 gallus gallus.

Lysozyme modifications are sparse and unspecific; the OP adduct is on lysines, tyrosines, serines and threonine. Lysozyme-OP was negative in Western blot, but weakly positive in ELISA with monoclonal antibody depY.

### tubulin alpha-1B chain [Bos taurus] P81947

1 mrecisihvg qagvqignac welyclehgi qpdgqmpsdk tigggddsfn tffsetgagk  
61 hvpravfdvl eptvidevrt gtyrqlfhpe qlitgkeda nnyarghyti gkeiidlvld  
121 rirkkladqct glqgflvfhs fgggtgsgft sllmerlsvd ygkksklefs iypapqvsta  
181 vvepynsilt thttlehsdc afmvdneaiy dicrrndie rptytnlnrl isqivssita  
241 slrfdgalnv dltefqtlnv p[]prihfpla tyapvisaek ayheqlsvae itnacfeapan  
301 qmvkcdprhg kymaccllyr gdvvpkdvna aiatiktksr iqfvdwceptg fkvginyqpp  
361 tvvpggdlak vqravcmlsn ttaiaeawar ldhkfdlmya krafvhwvyg egmeegefse  
421 aredmaalek dyeevgvdsv egegeeegee y

| Residue | % labeled diethoxyPhosphate (+136) |
|---------|------------------------------------|
| Y262    | 12 %                               |

1 tyrosine modified, 18 not modified

### PREDICTED: tubulin beta-7 chain [Bos taurus] E1B953

NCBI Reference Sequence: XP\_612678.3

1 mreivhiqag qcgnqigakf wevisdehgi datgtyhgds dlqldrisv[] [input type="checkbox"/>]neatggkyv  
61 prailvdlep gtmdsvhsgp fgqifrsdni vfgqsgadnn wakghyrega elvdsvladv  
121 rkeakscdcl qgfqlthslg ggtsgmgmtl liskireeyp dhimntfsv pspkvsdtvv  
181 epynatlsvh qlventdety cidnealyai cftrtlklttp tygdlnqlvs atmsgvttcl  
241 rfpqqlnadl hklavnmvpf phlhffvpgf apltscgsqq ywaltvpelt qqvfdaknmm  
301 aacdprhgr[] ltvaavfrgq msmkevdeqm lnvqknss[] fvewipnnvk tavcdipprg  
361 lkmavtfign staiqelfkr iseqlmamfr r[]aflhwytg egmdetefte aesnmndlvs  
421 eyqqyqdata eeedfgeea eeee

| Residue | % labeled diethoxyPhosphate (+136) |
|---------|------------------------------------|
| Y50     | 26%                                |
| Y51     | 14%                                |
| Y310    | 23%                                |
| Y340    | 19%                                |
| K392    | 71%                                |

4 tyrosines modified, 12 tyrosines not modified; 1 lysine modified, 15 lysines not modified

### tubulin beta-4B chain [Bos taurus] Q3MHM5

1 mreivhlqag qcgnqigakf wevisdehgi dptgtyhgds dlqlerinv[] [input type="checkbox"/>]neatggk[]v  
61 pravlvdllep gtmdsvrsgp fgqifrpdnf vfgqsgagnn wakgh[]tega elvdsvladv  
121 rkeaescdcl qgfqlthslg ggtsgmgmtl liskireeyp drimntfsv pspkvsdtvv  
181 epynatlsvh qlventdety cidneal[]di cftrtlklttp tygdlnhlvs atmsgvttcl  
241 rfpqqlnadl rklavnmvpf prlhffmpgf apltsrgsqq yraltvpelt qqmfdaknmm  
301 aacdprhgr[] ltvaavfrgr msmkevdeqm lnvqknss[] fvewipnnvk tavcdipprg

361 lkmsatfign staiqelfkr iseqftamfr r[**k**]aflhwytg egmdemefte aesnmndlvs  
 421 eyggygdata eeegefefeeea eeeva

| Residue | % labeled diethoxyPhosphate (+136) |
|---------|------------------------------------|
| Y50     | 18                                 |
| Y51     | 15                                 |
| Y59     | 21                                 |
| Y106    | 4                                  |
| Y208    | 26                                 |
| Y310    | 23                                 |
| Y340    | 19                                 |
| K392    | 71                                 |

7 tyrosines modified, 9 tyrosines not modified; 1 lysine modified, 14 lysines not modified

### Tubulin alpha-1A chain OS=Sus scrofa P02550

1 mrecisihvg qagvqignac welyclehgi qpdgqmpsdk tigggddsfn tffsetgagk  
 61 hvpravfvdI eptvidevrt gt[**v**]rqlfhpe qlitg[**k**]edaa nn[**v**]arghyti g[**k**]eiidlvld  
 121 rirkIadqct glqgfsvfhs fgggtgsgft sllmerIsvd [**v**]g[**k**]s[**k**]lefs i[**v**]papqvsta  
 181 vvepynsilt thttlehsdc afmvdneaiy dicrrnldie rpt[**v**]tnlnrl igqivssita  
 241 slrfdgalnv dltefqtnlv p[**v**]prahfpla t[**v**]apvisaek a[**v**]heqlsvae itnacfePan  
 301 qmvkcdprhg [**k**]ymaccllyr gdvvp[**k**]dvna aiati[**k**]t[**k**]rt iqfvdwcptg fkvgin[**v**]epp  
 361 tvvpggdla[**k**] vqravcmlsn ttaiaeawar ldh[**k**]fdlm[**v**]a [**k**]rafvhw[**v**]vg egmeegefse  
 421 aredmaalek dyeevgvdsv egegeeegee y

| Residue # | % Labeled (+136) | Residue # | % Labeled (+136) |
|-----------|------------------|-----------|------------------|
| Y83       | 9                | K96       | 16               |
| Y103      | 69               | K112      | 21               |
| Y108      | 42               | K163      | 27               |
| Y161      | 43               | K164      | 24               |
| Y172      | 14               | K166      | 17               |
| Y224      | 19               | K311      | 55               |
| Y262      | 16               | K326      | 41               |
| Y272      | 37               | K336      | 11               |
| Y282      | 10               | K338      | 8                |
| Y312      | 45               | K370      | 30               |
| Y357      | 7                | K394      | 33               |
| Y399      | 16               | K401      | 38               |
| Y408      | 18               |           |                  |

### Tubulin alpha-1B chain OS=Sus scrofa Q2XVP4

1 mrecisihvg qagvqignac welyclehgi qpdgqmpsdk tigggddsfn tffsetgagk  
 61 hvpravfvdI eptvidevrt gt[**v**]rqlfhpe qlitg[**k**]edaa nn[**v**]argh[**v**]ti g[**k**]eiidlvld  
 121 rirkIadqct glqgflvfhs fgggtgsgft sllmerIsvd [**v**]g[**k**]s[**k**]lefs i[**v**]papqvsta  
 181 vvepynsilt thttlehsdc afmvdneaiy dicrrnldie rpt[**v**]tnlnrl isqivssita  
 241 slrfdgalnv dltefqtnlv p[**v**]prihfpla t[**v**]apvisaek a[**v**]heqlsvae itnacfePan  
 301 qmvkcdprhg [**k**]ymaccllyr gdvvp[**k**]dvna aiati[**k**]t[**k**]rs iqfvdwcptg f[**k**]vgin[**v**]qpp  
 361 tvvpggdla[**k**] vqravcmlsn ttaiaeawar ldh[**k**]fdlm[**v**]a [**k**]rafvhw[**v**]vg egmeegefse  
 421 aredmaalek dyeevgvdsv egegeeegee y

| Residue # | % Labeled (+136) | Residue # | % Labeled (+136) |
|-----------|------------------|-----------|------------------|
| Y83       | 6                | K96       | 16               |
| Y103      | 67               | K112      | 25               |
| Y108      | 17               | K163      | 30               |
| Y161      | 28               | K164      | 14               |
| Y172      | 25               | K311      | 55               |



|      |    |      |    |
|------|----|------|----|
| Y224 | 27 | K326 | 8  |
| Y262 | 27 | K336 | 4  |
| Y272 | 31 | K338 | 6  |
| Y282 | 27 | K352 | 71 |
| Y312 | 45 | K370 | 19 |
| Y357 | 7  | K394 | 48 |
| Y399 | 33 | K401 | 60 |
| Y408 | 18 |      |    |

### Tubulin beta chain OS=Sus scrofa Q767L7

1 mreivhiqag qcgngigakf wevisdehgi dptgtyhgds dlqldrisvy yneatggk[**V**]  
61 prailvdlep gtmdsvrsgp fgqifrpdnf vfgqsgagnn wak[**gh**][**V**]tega elvdsvldvv  
121 rkeaescdcl qgfqlthslg ggtgsgmgtl lis[**k**][**i**][**r**][**e**][**e**][**v**][**p**]drimntfsvv pspkvsdtvv  
181 ep[**v**]natlsvh qlventdety cidnealydi cfrtl[**k**]lttp tygdlnhlvs atmvgvttcl  
241 rfpqqlnadl r[**k**]lavnmpvf prlhffmpgf apltsrgsqg [**v**]raltvpelt qqvfdaknmm  
301 aacdprhgr[**v**] ltvaavfrgr msmk[**e**]vdeqm lnvqknss[**v**] fvewipnnvk tavcdipprg  
361 lkmavtfign staiqelf[**k**]r iseqftamfr r[**k**]afllhw[**v**]tg egmdemefte aesnmndlvs  
421 eyqqyqdata eeedfgeea eeea

| Residue # | % Labeled (+136) | Residue # | % Labeled (+136) |
|-----------|------------------|-----------|------------------|
| Y59       | 8                | K103      | 24               |
| Y106      | 12               | K154      | 23               |
| Y159      | 27               | K216      | 50               |
| Y183      | 7                | K252      | 14               |
| Y281      | 22               | K324      | 15               |
| Y310      | 35               | K379      | 11               |
| Y340      | 46               | K392      | 100              |
| Y398      | 36               |           |                  |

### Tubulin beta chain OS=Sus scrofa P02554

1 mreivhiqag qcgngigakf wevisdehgi dptgsyhgds dlqlerinv[**v**] [v]neaagn[**ky**][**v**]  
61 prailvdlep gtmdsvrsgp fgqifrpdnf vfgqsgagnn wak[**gh**][**v**]tega elvdsvldvv  
121 rkesescdcl qgfqlthslg ggtgsgmgtl lis[**k**][**i**][**r**][**e**][**e**][**v**][**p**]drimntfsvv pspkvsdtvv  
181 ep[**v**]natlsvh qlventdety cidnealydi cfr[**t**][**l**][**k**]lttp t[**v**]gdlnhlvs atmvgvttcl  
241 rfpqqlnadl r[**k**]lavnmpvf prlhffmpgf apltsrgsqg [v]raltvpelt qqmfdaknmm  
301 aacdprhgr[**v**] ltvaavfrgr msm[**k**]evdeqm lnvqknss[**v**] fvewipnnvk tavcdipprg  
361 l[**k**]msatfign staiqelf[**k**]r iseqftamfr r[**k**]afllhw[**v**]tg egmdemefte aesnmndlvs  
421 eyqqyqdata deggefefeeg eeeda

| Residue # | % Labeled (+136) | Residue # | % Labeled (+136) |
|-----------|------------------|-----------|------------------|
| Y50       | 15               | K58       | 18               |
| Y51       | 12               | K103      | 24               |
| Y59       | 8                | K154      | 16               |
| Y106      | 12               | K216      | 50               |
| Y159      | 27               | K252      | 42               |
| Y183      | 7                | K324      | 18               |
| Y222      | 4                | K362      | 47               |
| Y281      | 17               | K379      | 63               |
| Y310      | 35               | K392      | 100              |
| Y340      | 30               | T214      | 50               |
| Y398      | 36               |           |                  |

Bovine and porcine tubulin-OP gave strong positive signals on Western blots and ELISA with monoclonal antibody depY.
